# Supplementary material for: A novel aptamer-based competition strategy for ultrasensitive electrochemical detection of leukemia cells
Source: Royal Society of Chemistry journal article supplement (doi:10.1039/c3an01255g), 2013-01-01
Supplement: c3an01255g.pdf [file c3an01255g.pdf]

## Electronic Supplementary Information

### A novel aptamer-based competition strategy for ultrasensitive electrochemical detection of leukemia cells

Kui Zhang<sup>‡ a,b</sup>, Tingting Tan<sup>‡a,b</sup>, Jia-Ju Fu<sup>b</sup>, Tingting Zheng<sup>b</sup>, and Jun-Jie Zhu<sup>b\*</sup>

#### Optimization of the detection conditions

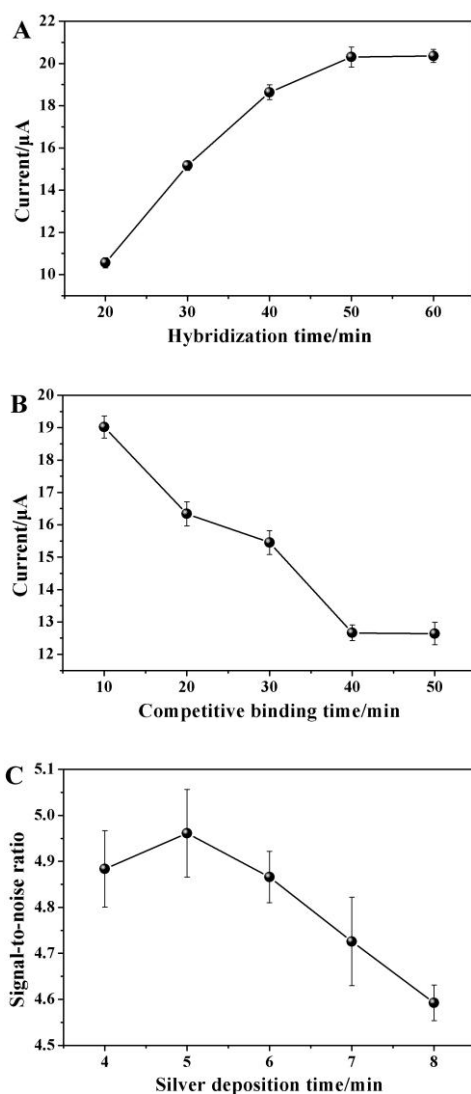

**Fig. S1.** (A) Effect of incubation time on hybridization between  $\text{Fe}_3\text{O}_4$  MNP-bound aptamers and AuNP-conjugated cDNA. (B) Effect of incubation time on CCRF-CEM cells ( $1.0 \times 10^4 \text{ mL}^{-1}$ ) competing with AuNP-conjugated cDNA to bind preferentially to  $\text{Fe}_3\text{O}_4$  MNP-bound aptamers. (C) Signal-to-noise ratio of different silver deposition times. The error bars represent RSD from three independent experiments.
